# Supplementary material
Source: ML conference proceedings conference paper supplement (https://openreview.net/forum?id=tw60PTRSda2)
Supplement: supplementary_material [file attachment]

## A APPENDIX: HYPER-PARAMETER SELECTION FOR NON-NEGATIVE MATRIX FACTORIZATION

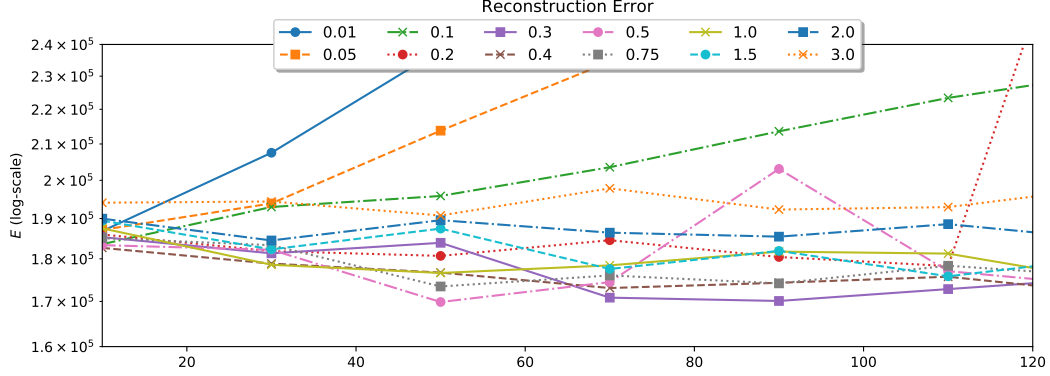

Figure 4: A zoom-in plot for the reconstruction errors.

Denote  $M_t, M_v \in \{0, 1\}^{n \times m}$  to be the mask matrices for indicating held-in and held-out entries of the input PPMM matrix  $P$  in CV procedure, we then optimize for  $O^*$  and  $V^*$ :

$$O^*, V^* = \underset{O, V}{\operatorname{argmin}} \|M_t \odot (P - OV^T)\|_F^2 + \beta \mathcal{R}(O, V). \quad (6)$$

To apply the multiplicative update scheme as proposed in (Lee & Seung, 2001), we first consider the partial derivatives with respect to  $O$  and  $V$ . Denote  $F(O, V) \equiv \|M_t \odot (P - OV^T)\|_F^2 + \beta \mathcal{R}(O, V)$ , we have

$$\begin{aligned} \nabla_O F(O, V) &= (M_t \odot OV^T)V - (M \odot P)V + \beta \cdot \mathbf{1} \\ \nabla_V F(O, V) &= (M_t \odot OV^T)^T U - (M \odot P)^T U + \beta \cdot \mathbf{1}. \end{aligned} \quad (7)$$

We then have the following update rules that is guaranteed to be non-increasing:

$$\begin{aligned} O^{(i+1)} &\leftarrow O^{(i)} \odot \frac{(M_t \odot P)V^{(i)}}{(M_t \odot O^{(i)}(V^{(i)})^T)V^{(i)} + \beta} \\ V^{(i+1)} &\leftarrow V^{(i)} \odot \frac{(M_t \odot P)^T U^{(i)}}{(M_t \odot O^{(i)}(V^{(i)})^T)U^{(i)} + \beta}, \end{aligned} \quad (8)$$

where the fraction here represents elementary-wise division. For the choice of  $M_t$  and  $M_v$ , we follow the same approach as proposed in (Kanagal & Sindhwani, 2010). We first split the matrix into  $K$  blocks, where the rows and columns are randomly shuffled. Denote  $\mathbf{r}^{(k)}$  and  $\mathbf{c}^{(k)}$  to be the index vectors for rows and columns respectively, where  $\mathbf{r}_i^{(k)} = 1$  if row  $i$  contains in block  $k$ , or  $\mathbf{c}_j^{(k)} = 1$  if column  $j$  contains in block  $k$ . The mask for  $k$ -th block can then be expressed as  $M^{(k)} = \mathbf{r}^{(k)} \otimes \mathbf{c}^{(k)}$ . We then randomly select  $q$  out of  $K$  blocks as holdout blocks, which gives

$$M_v = \sum_{s=1}^q \mathbf{r}^{(k_s)} \otimes \mathbf{c}^{(k_s)}, \quad M_t = \mathbf{1} - M_v, \quad (9)$$

where  $k_s$  is the index of selected block. The reconstruction error  $E$  can thus be computed:

$$E = \|M_v \odot (P - O^*(V^*)^T)\|_F^2 + \beta \mathcal{R}(O^*, V^*). \quad (10)$$

Figure 4 shows a zoom-in plot of the reconstruction error under different combinations of  $d$  and  $\beta$ . For every  $(d, \beta)$  setting, we perform multiple optimization since NMF is sensitive to initialization. We then choose  $d = 70$  and  $\beta = 0.3$  accordingly. Empirically, we observe that the rank selection is quite robust to over-fitting when there is a sufficient sparsity control, for instance,  $\beta > 0.1$  in our dataset. We also observe that whenever  $d \in [50, 150]$  and  $\beta \in [0.05, 0.5]$ , the results are similar.

## B APPENDIX: DISTRIBUTION OF AAUCs ON WTACTION AND MSCOCO DATASET

The following figures show the AAUC distribution of the top 5 embeddings on the WTaction and MSCOCO dataset respectively.

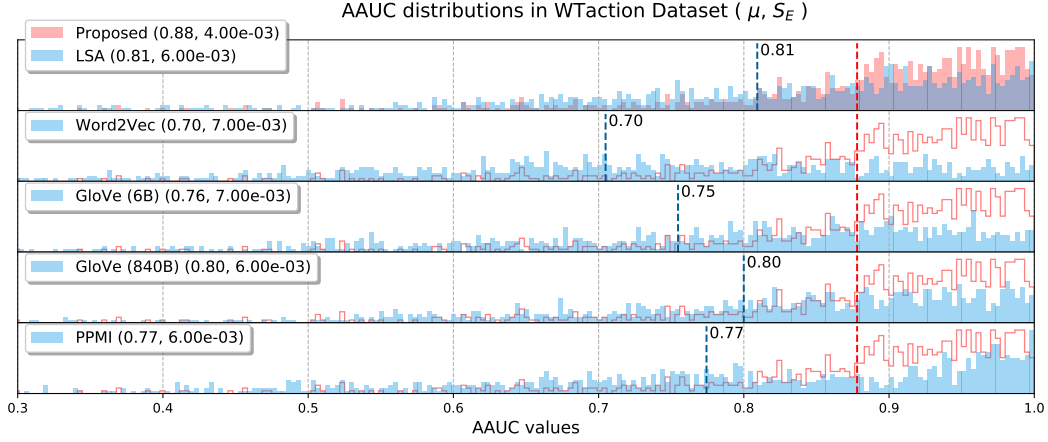

Figure 5: AAUC Distribution on WTaction Dataset

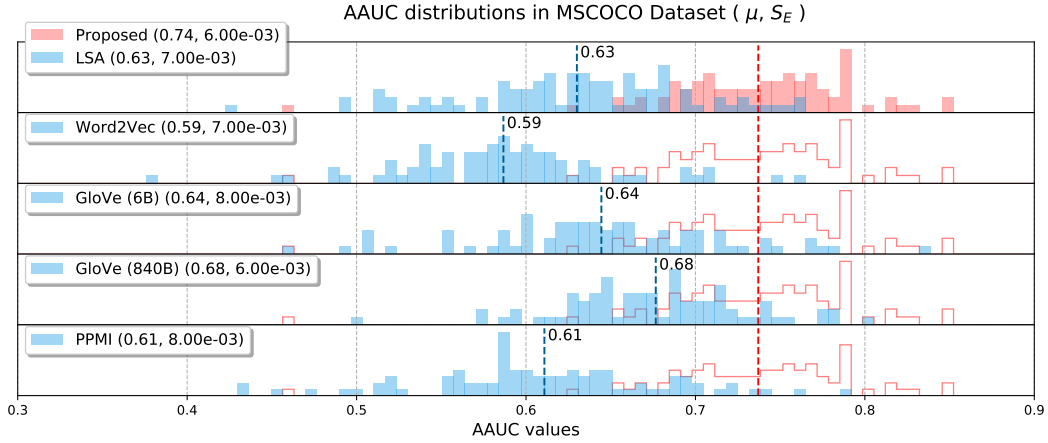

Figure 6: AAUC Distribution on MSCOCO Dataset

## C APPENDIX: AFFORDANCES ASSIGNMENT FOR EACH SPOSE DIMENSION

| Pearson correlation | Dimension label    | Taxonomy    | Affordances (Top Ten Ranked Verbs)                                                                  |
|---------------------|--------------------|-------------|-----------------------------------------------------------------------------------------------------|
| 0.84                | animal             | categorical | kill, spot, hunt, observe, chase, feed, slaughter, sight, trap, find                                |
| 0.82                | food               | categorical | serve, eat, cook, prepare, taste, consume, add, mix, stir, order                                    |
| 0.75                | wearable           | categorical | wear, don, match, knit, sew, fasten, rip, embroider, tear, model                                    |
| 0.75                | vehicle            | categorical | drive, hire, park, equip, rent, commandeering, crash, board, build, operate                         |
| 0.71                | plant              | categorical | grow, cultivate, plant, add, eat, chop, gather, cut, dry, prune                                     |
| 0.68                | musical instrument | categorical | hear, sound, play, learn, amplify, blare, study, tootle, toot, tinkle                               |
| 0.68                | electronic device  | categorical | install, operate, connect, activate, invent, disconnect, manufacture, purchase, incorporate, design |
| 0.67                | made of metal      | structural  | fit, invent, manufacture, incorporate, design, position, attach, utilize, carry, install            |
| 0.66                | body/clothing      | categorical | wear, don, straighten, slash, bandage, hurt, rip, injure, heal, model                               |
| 0.63                | bug                | categorical | kill, catch, spot, observe, find, eradicate, deter, trap, hunt, feed                                |
| 0.63                | drink              | categorical | drink, pour, quaff, sip, guzzle, sup, swig, spill, imbibe, gulp                                     |
| 0.61                | tool               | categorical | wield, grab, hold, carry, sharpen, swing, hand, pick, clutch, throw                                 |
| 0.57                | can tie            | functional  | fasten, tighten, unfasten, undo, attach, thread, tie, secure, loosen, loose                         |
| 0.55                | marine             | categorical | spot, beach, moor, sail, observe, find, sight, capsize, catch, call                                 |
| 0.54                | granulated         | structural  | contain, mix, scatter, add, gather, remove, sprinkle, dry, deposit, shovel                          |
| 0.52                | valuable/old       | functional  | steal, discover, find, carve, place, design, contain, recover, craft, hide                          |
| 0.52                | object (house)     | categorical | design, manufacture, fit, incorporate, install, place, fill, purchase, clean, buy                   |
| 0.52                | aeronautic         | categorical | spot, observe, sight, destroy, build, construct, find, photograph, equip, design                    |
| 0.52                | outdoors           | categorical | remove, construct, place, surround, incorporate, carry, erect, design, fit, build                   |
| 0.50                | body part          | categorical | sprain, fracture, bandage, flex, injure, rest, bruise, straighten, hurt, hyperextend                |
| 0.50                | weapon             | categorical | throw, carry, hurl, drop, grab, wield, retrieve, fire, hold, toss                                   |
| 0.48                | flammable          | functional  | light, extinguish, ignite, throw, carry, flash, kindle, place, manufacture, douse                   |
| 0.47                | textured           | appearance  | remove, place, hang, tear, stain, spread, weave, clean, drape, wrap                                 |
| 0.44                | round              | appearance  | grow, cultivate, pick, add, slice, place, eat, chop, throw, plant                                   |
| 0.44                | accessory (beauty) | categorical | steal, wear, find, place, gather, pick, remove, contain, give, sell                                 |
| 0.42                | mineral/gem        | categorical | steal, discover, recover, contain, retrieve, find, hide, place, remove, incorporate                 |
| 0.42                | accessory (face)   | categorical | wear, remove, don, place, design, buy, call, pull, bring, find                                      |
| 0.40                | made of wood       | structural  | place, remove, carry, incorporate, design, contain, bring, construct, manufacture, find             |
| 0.40                | container          | functional  | empty, fill, carry, place, clean, load, bring, dump, unload, leave                                  |
| 0.38                | elongated          | structural  | grab, carry, wield, hold, pick, place, throw, hand, bring, drop                                     |
| 0.38                | structure          | structural  | incorporate, construct, fit, design, erect, position, install, mount, place, build                  |
| 0.38                | object (bath)      | categorical | manufacture, remove, place, invent, clean, buy, put, apply, contain, design                         |
| 0.37                | string-like        | appearance  | remove, cut, place, pull, wrap, attach, manufacture, contain, call, bring                           |
| 0.36                | wheeled            | functional  | drive, manufacture, hire, design, equip, fit, rent, park, purchase, invent                          |
| 0.36                | made of paper      | structural  | manufacture, design, purchase, buy, place, invent, introduce, incorporate, fit, sell                |
| 0.33                | appliance/machine  | categorical | fit, manufacture, connect, design, install, incorporate, attach, utilize, purchase, invent          |
| 0.32                | sport (ball)       | categorical | manufacture, design, invent, buy, purchase, grab, carry, introduce, fit, bring                      |
| 0.32                | object (children)  | categorical | buy, manufacture, design, purchase, bring, find, sell, introduce, steal, call                       |
| 0.31                | agglomerate        | appearance  | place, contain, add, remove, sell, manufacture, combine, find, buy, steal                           |
| 0.29                | flat surface       | appearance  | place, bring, remove, put, grab, hang, wrap, manufacture, buy, pull                                 |
| 0.28                | circular           | appearance  | place, incorporate, fit, invent, remove, manufacture, design, call, position, utilize               |
| 0.26                | accessory (black)  | categorical | remove, grab, manufacture, buy, place, design, bring, wear, carry, invent                           |
| 0.24                | colorful pattern   | appearance  | manufacture, buy, design, place, remove, sell, invent, purchase, contain, bring                     |
| 0.23                | object (medical)   | categorical | invent, place, remove, find, contain, manufacture, design, bring, carry, buy                        |
| 0.23                | craft              | appearance  | place, bring, remove, design, hang, call, buy, put, pull, manufacture                               |
| 0.22                | permeable          | structural  | fit, incorporate, remove, place, design, manufacture, install, position, clean, attach              |
| 0.18                | object (small)     | categorical | place, call, remove, buy, find, bring, manufacture, introduce, contain, incorporate                 |
| 0.18                | degree of red      | appearance  | place, call, add, contain, remove, find, buy, bring, introduce, sell                                |
| 0.12                | furry              | appearance  | place, call, find, remove, buy, bring, introduce, contain, add, manufacture                         |

Table 3: Affordance assignment for SPoSE vectors ordered in terms of Pearson correlation with regression outcomes. The dimension labels are vastly simplified. The full descriptions for each dimension are provided in Appendix D (Table 4 and Table 5).

## D APPENDIX: FULL DESCRIPTIONS FOR EACH SPoSE DIMENSION

The abbreviation and the full description of every SPoSE dimension.

| Abbreviation       | Full descriptions                                                                                                                                                                                                                                                                                                                              |
|--------------------|------------------------------------------------------------------------------------------------------------------------------------------------------------------------------------------------------------------------------------------------------------------------------------------------------------------------------------------------|
| accessory (black)  | accessories, beauty, black, blackness, classy, date, emphasize, fancy, hair, hard, high-class, manly, objects, picture, telescope                                                                                                                                                                                                              |
| accessory (face)   | accessories, body parts, culture, decoration, eyes, face, face accessories, facial, goes on head, hair, head, less appealing, senses, touches face, wearable                                                                                                                                                                                   |
| accessory (beauty) | accessory, beautiful, beauty, color, fancyness, feminine, feminine items, floral, flowers, flowery, gentle, girly, love, muted colors, pastel, pink                                                                                                                                                                                            |
| aeronautic         | aero-nautic, air, airplanes, aviary, aviation, buoyant, flies, flight, fly, flying, flying to not, high in air, light, move, sky, swim, transportation, travel                                                                                                                                                                                 |
| agglomerate        | accumulatable, bundles, collection, colors, countable, grainy to smooth, group of similar things, groupings, groups, groups of small objects, large groups, little bits of things, many, metals, nuts, objects, patterns, piles, quantity of objects in photo, round, small, small objects in groups, small parts that look alike, symmetrical |
| animal             | animal, animals, animals in zoo, animals that do not fly, from complex to less, fuzzy, grass, ground animals, land animals, mammal, mammals, natural, size, wild animals, wild to human-made, wilderness                                                                                                                                       |
| appliance/machine  | building materials, construction, destructive, electric items, factory, farm tools, foundation, home tools, in groups, long, machinery, maintenance, mostly orange, processing, renovation, rocks, rope-like, thing, tool, tools                                                                                                               |
| body part          | body, body parts, esp extremities, extremities, extremities of body, feet, feet to hands, fingers, found on people, hand, hands, human, legs, limbs, lower body, skin                                                                                                                                                                          |
| body/clothing      | bodies, body, body accessories, body maintenance, body part- related, body parts, body parts with hair, face, how much skin showing, human, human body parts, part of body, parts, people, skin, touched by skin                                                                                                                               |
| bug                | animals that stick onto things, ants, bug, bugs, can hurt you, dangerous, gardening, insects, interact with bugs, small animals, small to large, wild                                                                                                                                                                                          |
| can tie            | bands, bondages, can tie, chained, circles, coils, construction, fasteners, knotting, long, rope, ropes, round, string-like, strings, tensile, thing can tie around, tied, ties, trapped, violent, wires, wrap, wrapped around to what gets wrapped                                                                                            |
| circular           | circles, circular, cylindrical, discs, flat, round, shape, targets                                                                                                                                                                                                                                                                             |
| colorful pattern   | artistic, bright, bright colors, color, color variety, color vibrancy, colorful, colors, many colors, patterns                                                                                                                                                                                                                                 |
| container          | able to put something in it, boxes, buckets, can put things into, carts, container, containers, containers for liquids, containing, covering, cylinders, diverse, drums, enclosed objects, hold other things, hollow tubes, paints, shapes, storage, unknown                                                                                   |
| craft              | a lot of patterns, art, artinsal, arts, candles, circles, color, crafts, detailed dots, do-it-yourself, grandma, grandparent-like, handmade, home patterns, home-making related, housework, in grandma's home, intricacy, quilt, rectangles, sewing, specks, stitching, twine, unknown, weaving, wood, woven, yarn                             |
| degree of red      | color, colors, degree of redness, red, red (bright)                                                                                                                                                                                                                                                                                            |
| drink              | 3-dimensional, beverage, containers, containers for liquids, drinks, edible, glass, glasses, hold liquid, liquid, liquids, other things, things that fit in containers, things that hold liquids, vessels with liquids, viscosity                                                                                                              |
| electronic device  | digital, digital devices, digital media, electric, electronic, electronics, hard, hard to understand, media, old technology, technological, technology, telephones, typing instruments                                                                                                                                                         |
| elongated          | able to be held, cane, cylinders, cylindrical, darts, grouped, long, long narrow, long objects, long-shaped, narrow, pen-like, pencils, pens, shape, sharp, skinny rectangles, stick-like, sticks, straight, straight to curved, symmetrical, thin                                                                                             |
| flammable          | fire, flammability, flammable, heat, hot, light, outdoors, warm                                                                                                                                                                                                                                                                                |
| flat surface       | attaching, breakable, clean, cloth, convenience, disposable, flat coverings, gathering, grated pattern, handle everyday, helpful, hold things in, multi-shaped, not smooth to smooth, paper, paper-like, sheets, stick-like, thin, things that roll, tissue, white                                                                             |
| food               | baked food, baked goods, carbs, cheesy, comforting, cooked, deliciousness, edible, entrees, food, made dish, natural products, nutrients, pastry, prepared food, processed, salt, where it comes from                                                                                                                                          |
| furry              | fluffy, furry, more of one color, white, white and fluffy, winter                                                                                                                                                                                                                                                                              |
| granulated         | a lot of items, ash, color, dirt, elements, grain-looking, grains, grainy, grainyness, granular objects, ground, ground (grinded), homogeneity, lots of same, many, not colorful, particles, rocky, shape, size of particles, small, small particles, stones, tiny groupings, tone, unknown minerals or drugs                                  |
| made of metal      | buckle, build, building, gray, hard, metal, metal tools, metallic, metallic tools, metals, shiny, silver, tools, use with hands                                                                                                                                                                                                                |
| made of paper      | books, card, classroom, collections, flatness, found in office, groups, has text, note-taking, office, paper, paper (colorful), papers, printed on, reading materials, rectangles, school, square, squares, stacks, striped, work                                                                                                              |
| made of wood       | brown, made of wood, natural, natural resources, orange, wood, wood-colored, yellow                                                                                                                                                                                                                                                            |
| marine             | aquamarine life, aquatic activities, cruise, fish, in water, marine, nautical, ocean, outdoor, outside water, paradise, sea, ships, vacation, water                                                                                                                                                                                            |

Table 4: Descriptions of abbreviation (A)

| Abbreviation       | Full descriptions                                                                                                                                                                                                                                                                                                                                  |
|--------------------|----------------------------------------------------------------------------------------------------------------------------------------------------------------------------------------------------------------------------------------------------------------------------------------------------------------------------------------------------|
| mineral/gem        | beauty, clear minerals, crystal, earth-derived, gems, ice, in an artistic way, inspecting, intricate, jewelry, jewels, metallic, natural, natural minerals, prized, pure, rare, reflective, round, roundish, sharp, shiny, shininess, sterile, translucent, valuable                                                                               |
| musical instrument | control noise, hearing, instruments, listen, listening, loud, make noise, music, music instruments, musical, musical instruments, recreational instruments                                                                                                                                                                                         |
| object (bath)      | bathroom, cleaning, essential everyday, gray, home (inside home), household items, hygiene, self-care, soap, toiletries, water, white                                                                                                                                                                                                              |
| object (children)  | baby, baby toys, child, child-like, children, dolls, toys, young, youth                                                                                                                                                                                                                                                                            |
| object (house)     | bland to colorful, chairs, cloth, common in household, everyday household, flat, furniture, house, house essentials, house surfaces, household commonness, household furniture, in house, living furniture, main component of room                                                                                                                 |
| object (medical)   | health, health-concerning, hospital, hygiene, injury, medical, medical instruments, medical supplies, medicine, sick, to good health, unhealthy, water, wellness                                                                                                                                                                                   |
| object (small)     | ?, amish, appealing, candles, circular, color? Unsure, colorful, covers, cylinders, cylindrical, flat fat cylinders, hands-on, jewelry, lids, saving, shape, similar-shaped, things you grab, twine, unknown, yellow                                                                                                                               |
| outdoors           | backyard, blue, brown colored, columns, common in outdoor, dirt, garden, landscape, man-made, monuments in nature, natural, nature, not colorful, outdoor objects, outdoorsy, park, pavement, pristine, public, quiet, rocks, rough, rows, scenery, separators, stand on their own, statues, stone, tools, wood, woodsy, yard                      |
| permeable          | can pass through, dot patterned, grates, holed, knit, little holes, mesh, metal, net, nets, octagonal, pattern, patterned, patterns, patterns (holes), repeated patterns, repeating, repeating patterns, repetitive, shiny, silver, small, strainer                                                                                                |
| plant              | green, green leaves, green plants, green plants and herbs, greenery, greenness, greens, grow, natural, nature, plant-like, plants, things that grow from earth, vegetable, vegetables                                                                                                                                                              |
| round              | artistic, ball, balls, circular, circular and colorful, circus, contrasting circles, fruits, kid, pictures, round, rund, shape, spherical                                                                                                                                                                                                          |
| sport (ball)       | athletic, ball toys, balls) to less active, competition, recreation, round, sport, sports, sports (active, sporty                                                                                                                                                                                                                                  |
| string-like        | amount of rigid ends, confetti, different shapes, elongated, hay, high-density, knots, lines, lines jutting out, long, long things mashed up, look like sticks, mesh, netting, patterns, prickly, protruding, repeating in an ordered way, rope, ropes, skinny, spiky, stacks, strings, stringy, symmetrical, tangled, twirled around              |
| structure          | amusement, antenna, big, caged, common to humans, complete, disordered, electrical, elongated, enclosures, found outside, grand, high, high in air, industrial, ladder, large, multiple cylinders, multiple similar things, narrow, outdoor, part of circle, shapes, stacks, structural, tall, things that go up, things that hang, trapped, wires |
| textured           | appealing, carpets, flat coverings, fractals, lay flat, mesh, pattern, patterned, patterns, pieces, rectangles, repeating shapes, repetitive, rugs, sheets, small repeating patterns, squares, textured                                                                                                                                            |
| tool               | elongated, hand tools, household, jagged, long, pointy tools, pole, saws, scrape, sharp, sharp tools, small instruments, straight, tools, use with hands, utility, wedges                                                                                                                                                                          |
| valuable/old       | English royalty, antiquity, bottles, bronze, fine things, gaudiness, gold, high-class, high-quality, history, important, jewelry, jewels, monarchy, old, ornaments, precious metals, pristine, royal, royalty, shiny, silver, trophy, valueable                                                                                                    |
| vehicle            | can be moved, car, cars, complex vehicles, construction, efficiency of transportation, fast, ground motorized vehicles, machinery, mobility, move, speed of movement, transportation, transportation vehicles, travel with, truck, vehicles, wheeled vehicles, wheels                                                                              |
| weapon             | black, danger, dangerous, equipment, masculine, military, negatively-associated, ornaments, risky, self-defense, somber, violence, violent, war, war-like, weaponry, weapons                                                                                                                                                                       |
| wearable           | accessories, blue, can wear or carry or put on, clothes, clothing, cotton clothing, covering body, shirt, things to wear, things you wear, touch body, touch person, utilities, warm clothes, wearable                                                                                                                                             |
| wheeled            | able to hold, bicycle, caged, can sit on, can stand or drive, carrier, chair, destinations, holds objects, light movement, mobility, motion, move someone, playful, round, thing, things with wheels, trapped, wagon, wheel, wheeled-structures, wheels                                                                                            |

Table 5: Descriptions of abbreviation (B)

## E APPENDIX: COMPONENTS OF SPoSE DIMENSION APPROXIMATION

The following consecutive Figures 7–12 show the component information of each SPoSE dimension. The percentage is calculated based on the portion  $w_i \cdot \|O_{:,i}\|$ , where  $w_i$  is the regression coefficient corresponding to our  $i$ -th embedding dimension. The right ticks show the dimension affordances.

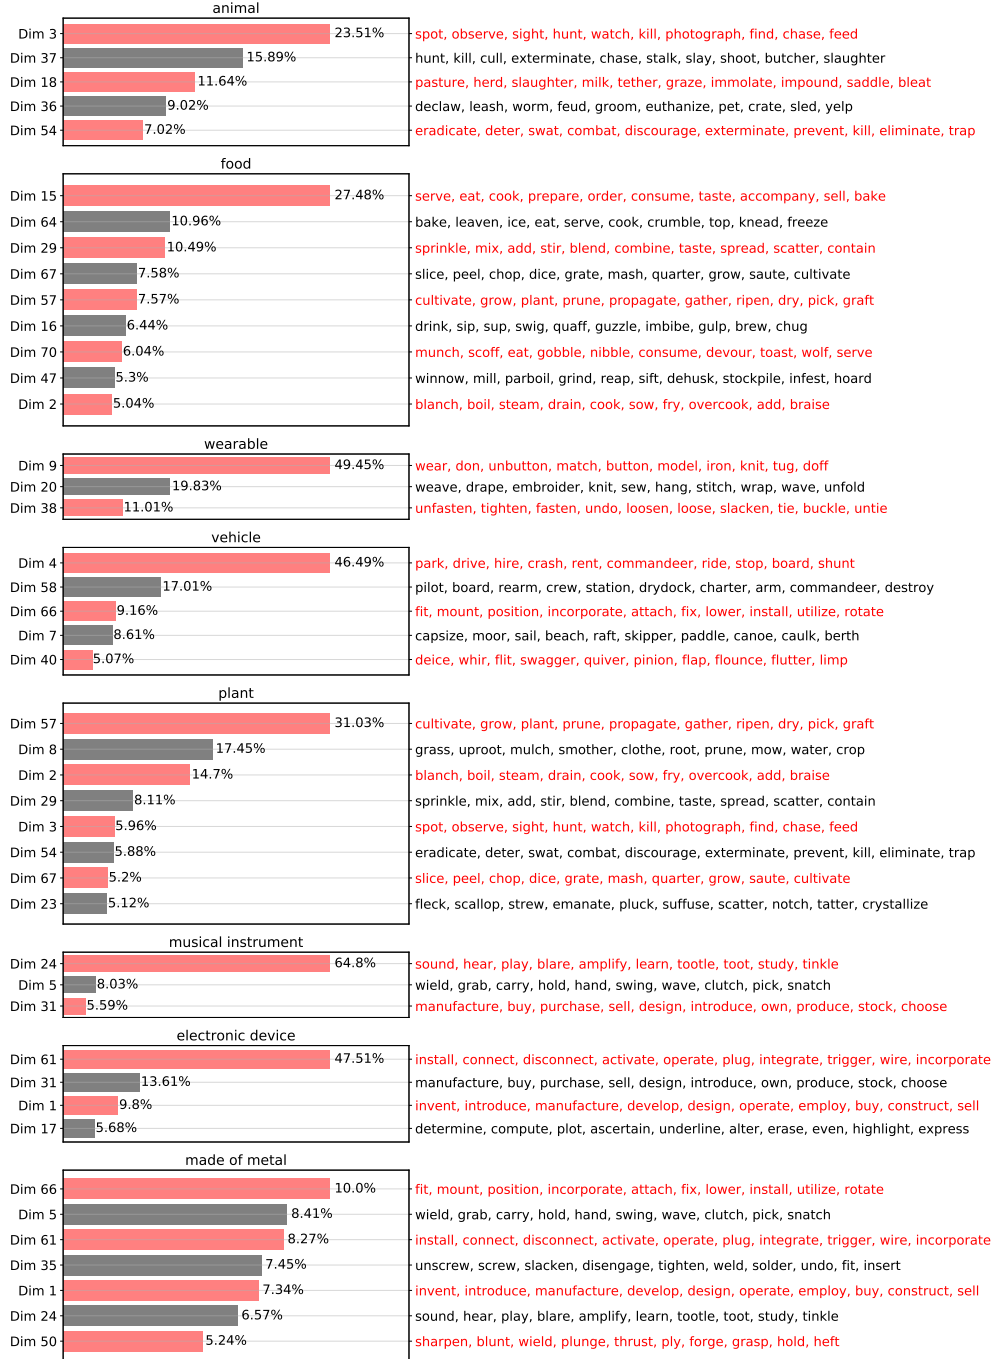

Figure 7: Components of SPoSE dimension approximation (A)

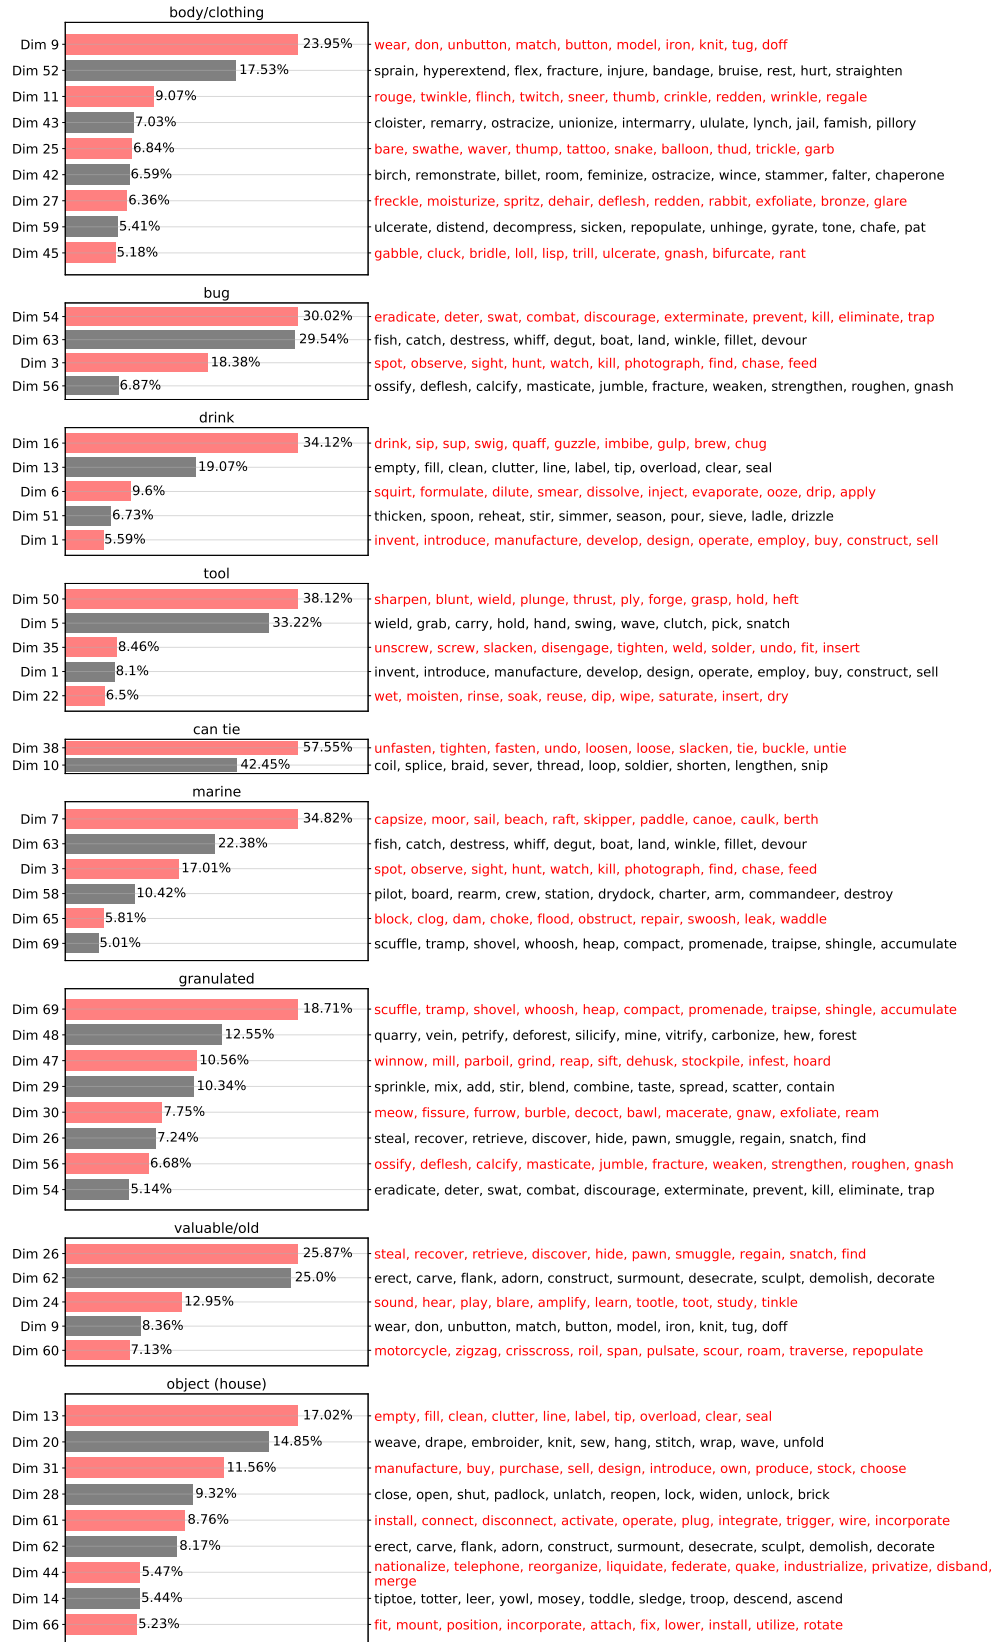

Figure 8: Components of SPoSE dimension approximation (B)

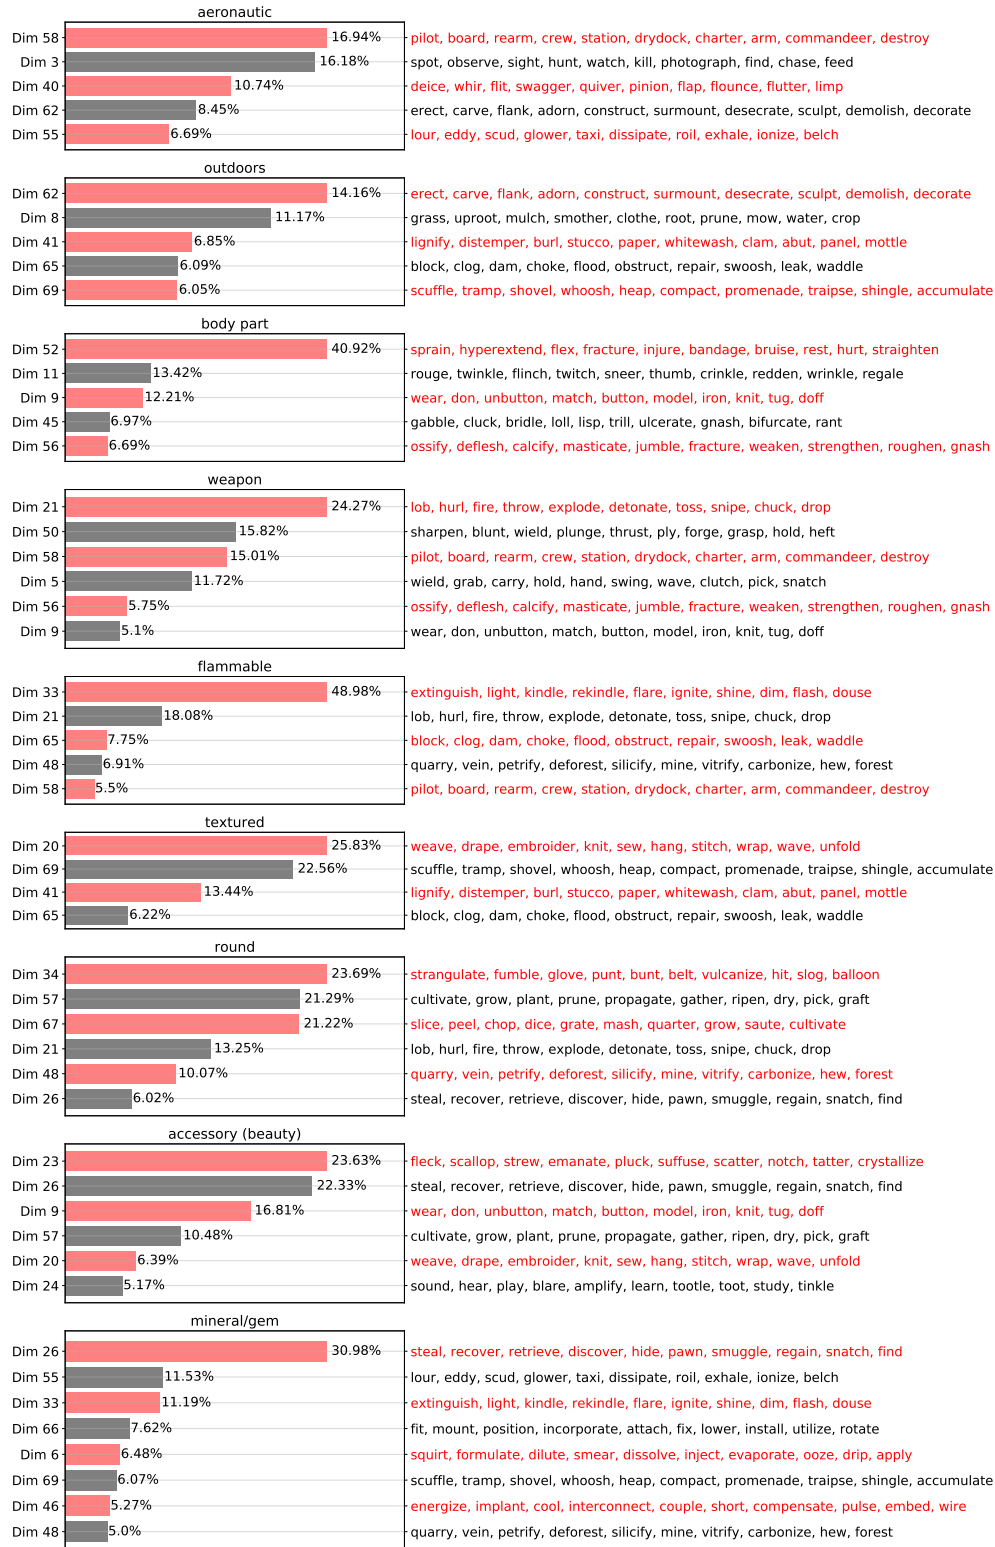

Figure 9: Components of SPoSE dimension approximation (C)



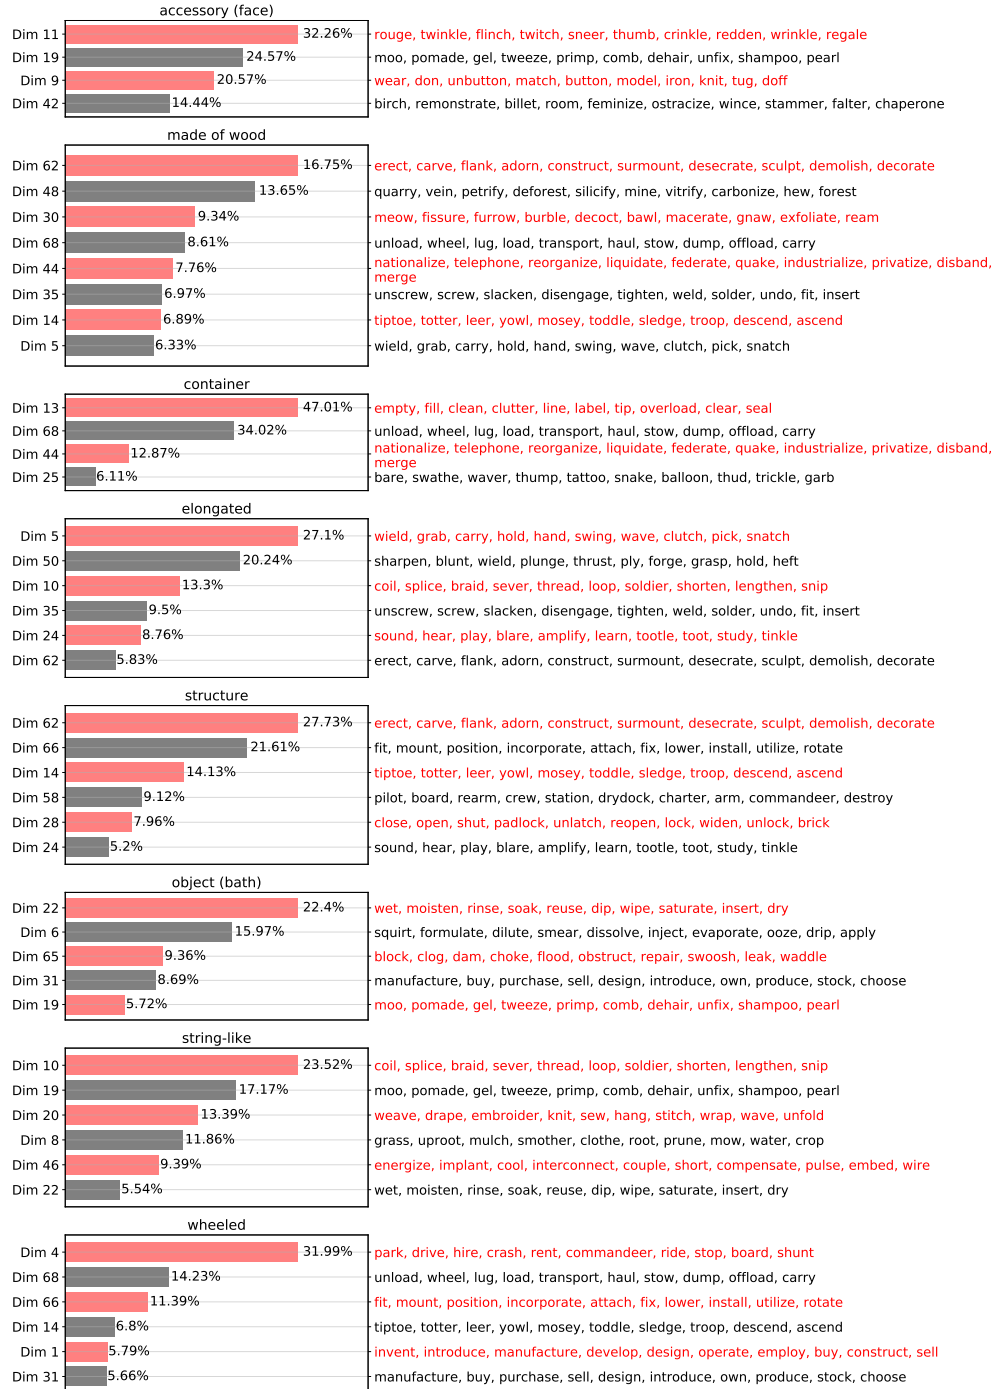

Figure 10: Components of SPOSE dimension approximation (D)

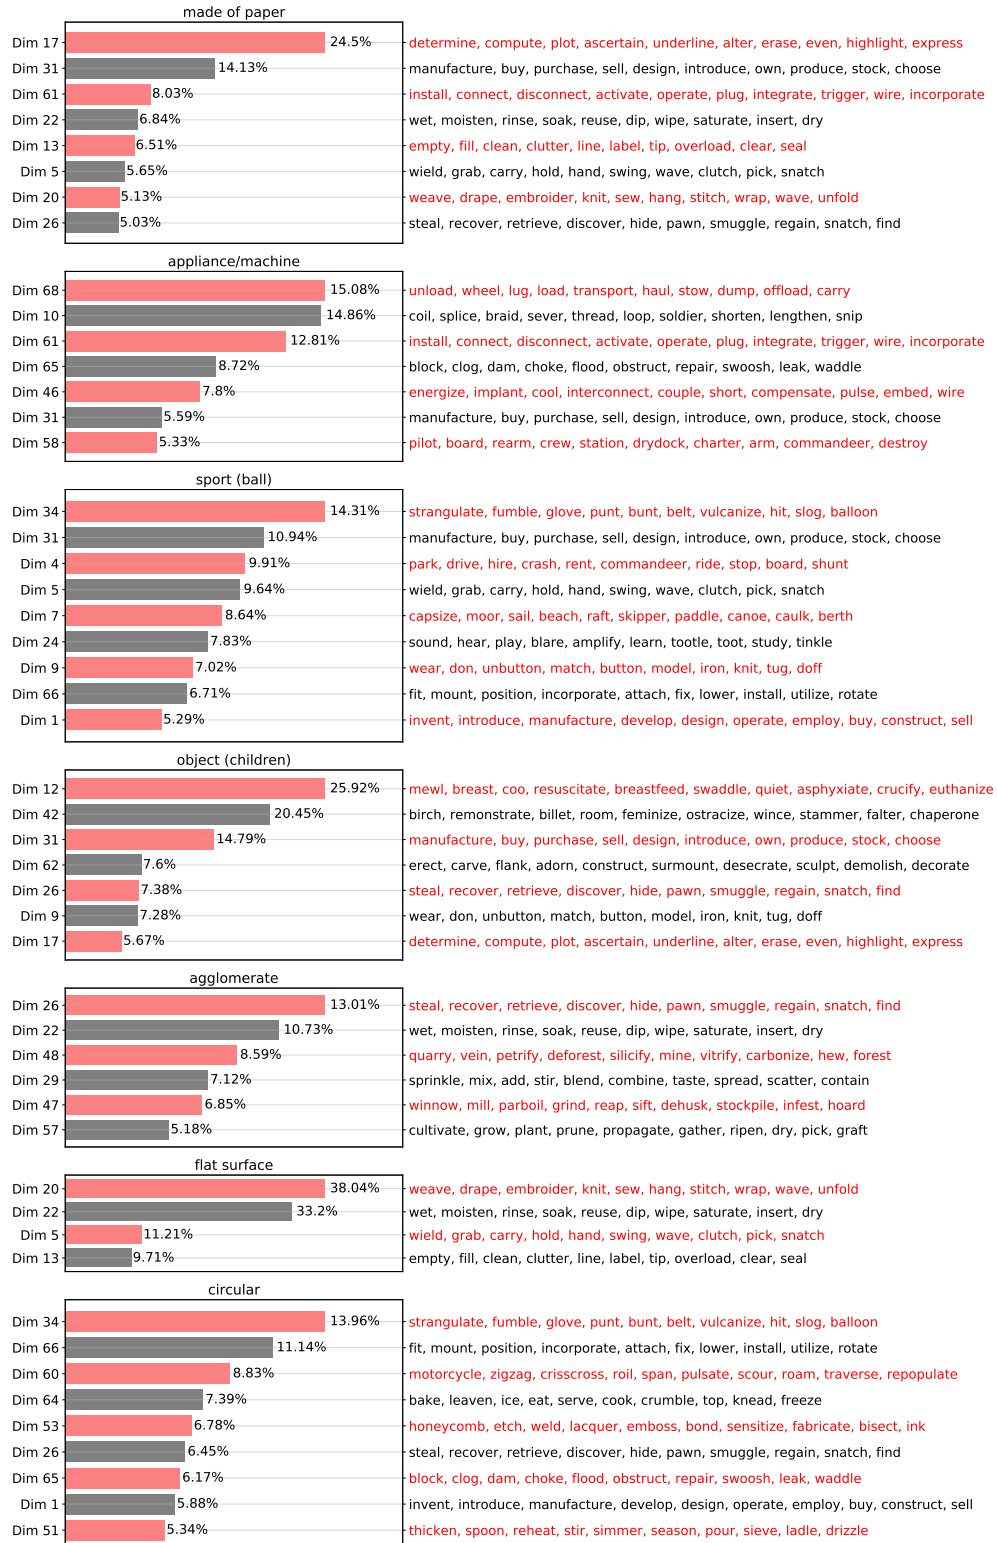

Figure 11: Components of SPoSE dimension approximation (E)

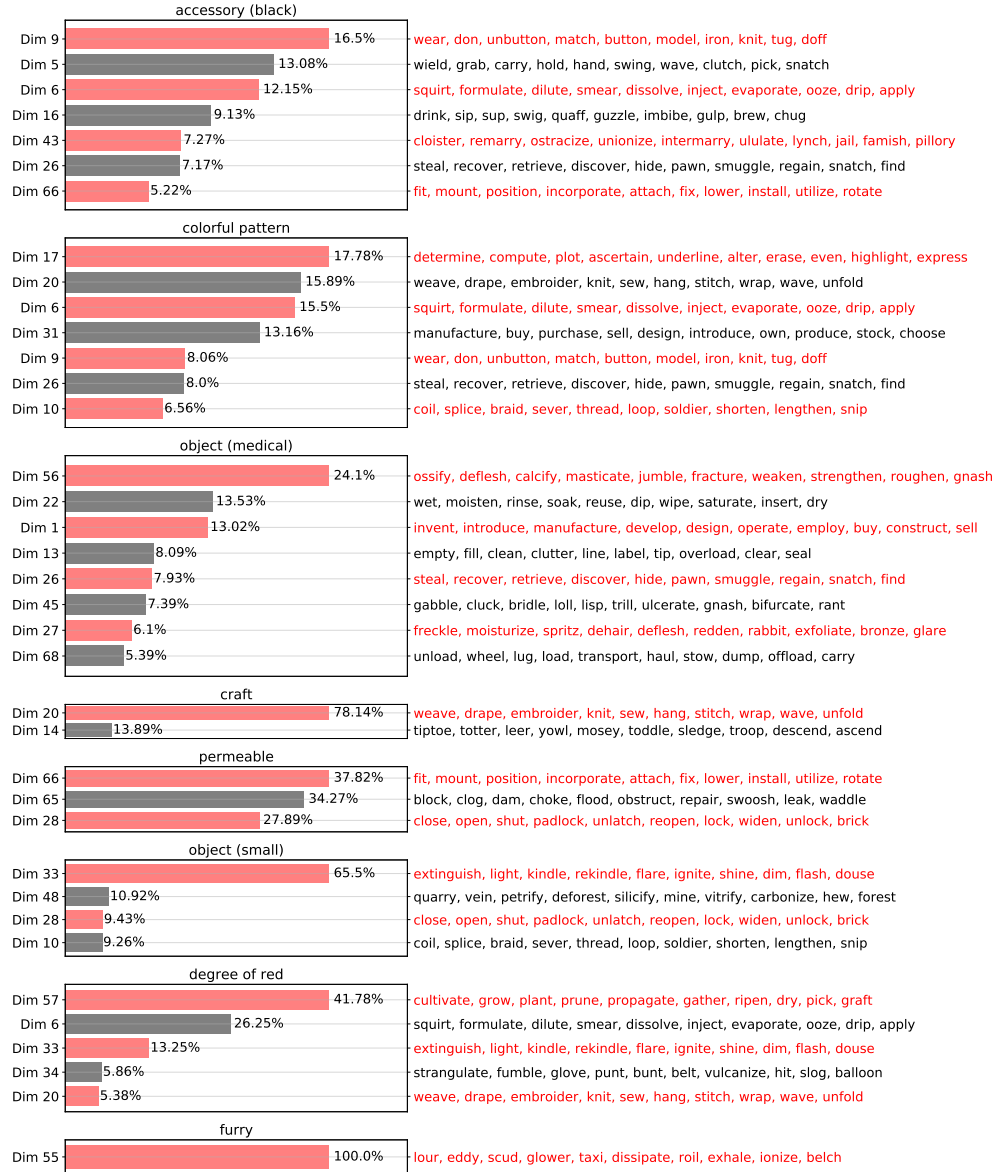

Figure 12: Components of SPoSE dimension approximation (F)
